# Supplementary material
Source: PubMed Central journal article supplement (PMC8243807)

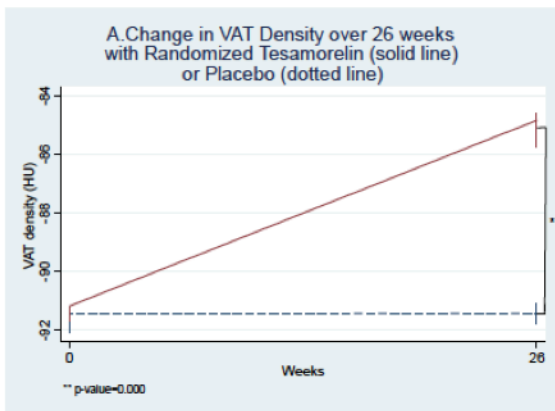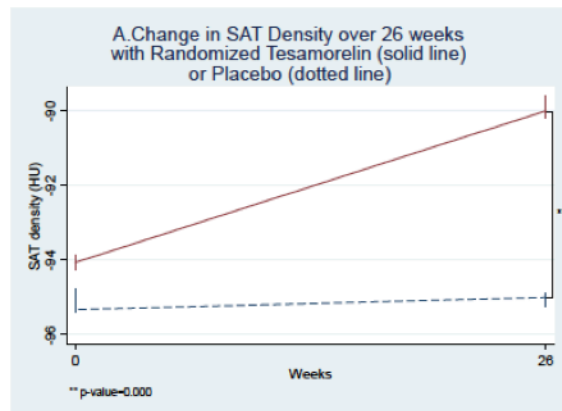

Supplement: NIHMS1685551-supplement-Supplemental_Figure_1.pdf [file NIHMS1685551-supplement-Supplemental_Figure_1.pdf]
